# Supplementary material for: IMGT/StatClonotype for Pairwise Evaluation and Visualization of NGS IG and TR IMGT Clonotype (AA) Diversity or Expression from IMGT/HighV-QUEST
Source: PubMed Central journal article supplement (PMC5016520; doi:10.3389/fimmu.2016.00339), 2016-09-09
Supplement: Data_Sheet_1.pdf [file Data_Sheet_1.pdf]

---

## ***Supplementary Material:*** **IMGT/StatClonotype for pairwise evaluation and visualization of NGS IG and TR IMGT clonotype (AA) diversity or expression from IMGT/HighV-QUEST**

**Safa Aouinti<sup>1,2,\*</sup>, Véronique Giudicelli<sup>1</sup>, Patrice Duroux<sup>1</sup>, Dhafer Malouche<sup>2</sup>,  
Sofia Kossida<sup>1,\*</sup>, Marie-Paule Lefranc<sup>1,\*</sup>**

\*Correspondence:

Safa Aouinti, Sofia Kossida, Marie-Paule Lefranc

safa.aouinti@igh.cnrs.fr, sofia.kossida@igh.cnrs.fr, marie-paule.lefranc@igh.cnrs.fr

### **1 SUPPLEMENTARY TABLES**

**Table S1.** Properties of the multiple testing procedures. These procedures are used in IMGT/StatClonotype for multiple testing error rate control (9).

| <b>Procedures</b>                          | <b>Type of control</b> | <b>Algorithm structure</b> | <b>Dependence of <math>p</math>-values under <math>H_0</math></b> | <b>Properties</b>                 |
|--------------------------------------------|------------------------|----------------------------|-------------------------------------------------------------------|-----------------------------------|
| <b>Bonferroni</b> [13]                     | FWER                   | <i>Single-step</i>         | Ignorance                                                         | The most conservative             |
| <b>Šidák (SS)</b> [14,15]                  | FWER                   | <i>Single-step</i>         | Independence                                                      | Less conservative than Bonferroni |
| <b>Holm</b> [16]                           | FWER                   | <i>Step-down</i>           | Ignorance                                                         | Less conservative than Bonferroni |
| <b>Šidák (SD)</b> [14,15]                  | FWER                   | <i>Step-down</i>           | Dependence                                                        | Similar to Holm                   |
| <b>Hochberg</b> [17]                       | FWER                   | <i>Step-up</i>             | Independence                                                      | <i>Step-up</i> of Holm            |
| <b>Benjamini &amp; Hochberg (BH)</b> [18]  | FDR                    | <i>Step-up</i>             | Independence                                                      | The least conservative            |
| <b>Benjamini &amp; Yekutieli (BY)</b> [19] | FDR                    | <i>Step-up</i>             | Ignorance                                                         | More conservative than BH         |

- FWER (Family-wise error rate): the probability to make one or more false positives.
- FDR (False discovery rate): the expected proportion of false positives.

**Table S2.** Statistical test results table headers. Headers definitions correspond to their use for significance results using multiple testing procedures (9).

| Table column                      | Description                                                                                                                                                                                                                                                                                 |
|-----------------------------------|---------------------------------------------------------------------------------------------------------------------------------------------------------------------------------------------------------------------------------------------------------------------------------------------|
| <b>Gene_Name</b>                  | The list of IMGT gene names found in the two compared sets from the IMGT/HighV-QUEST output                                                                                                                                                                                                 |
| <b>Gene_Type</b>                  | The type of genes (V, D or J)                                                                                                                                                                                                                                                               |
| <b>Nb.IMGT.clonotype_AA.set1</b>  | The nb of IMGT clonotypes (AA) in the first set from the IMGT/HighV-QUEST output with the corresponding gene indicated in the first column 'Gene_Name'                                                                                                                                      |
| <b>Proportion.set1</b>            | The proportion of IMGT clonotypes (AA) in the first set from the IMGT/HighV-QUEST output with the corresponding gene indicated in the first column 'Gene_Name'                                                                                                                              |
| <b>Normalized_proportion.set1</b> | The normalized proportion for 10,000 IMGT clonotypes (AA) in the first IMGT/HighV-QUEST output (set) with the corresponding gene indicated in the first column 'Gene_Name'                                                                                                                  |
| <b>Nb.IMGT.clonotype_AA.set2</b>  | The nb of IMGT clonotypes (AA) in the second set from the IMGT/HighV-QUEST output with the corresponding gene indicated in the first column 'Gene_Name'                                                                                                                                     |
| <b>Proportion.set2</b>            | The proportion of IMGT clonotypes (AA) in the second set from the IMGT/HighV-QUEST output with the corresponding gene indicated in the first column 'Gene_Name'                                                                                                                             |
| <b>Normalized_proportion.set2</b> | The normalized proportion for 10,000 IMGT clonotypes (AA) in the second IMGT/HighV-QUEST output (set) with the corresponding gene indicated in the first column 'Gene_Name'                                                                                                                 |
| <b>Difference_proportion</b>      | The difference in proportions of IMGT clonotypes (AA) in the two compared sets from the IMGT/HighV-QUEST output with the corresponding gene indicated in the first column 'Gene_Name'                                                                                                       |
| <b>z</b>                          | The <i>z</i> -score values to determine the significance of the difference between two proportions                                                                                                                                                                                          |
| <b>Lower_bound_IC.diff_prop</b>   | The lower bound of the 95% confidence interval (CI) for the difference in proportions of IMGT clonotypes (AA) in the two compared sets from the IMGT/HighV-QUEST output                                                                                                                     |
| <b>Upper_bound_IC.diff_prop</b>   | The upper bound of the 95% confidence interval (CI) for the difference in proportions of IMGT clonotypes (AA) in the two compared sets from the IMGT/HighV-QUEST output                                                                                                                     |
| <b>rawp</b>                       | The <i>p</i> -values obtained from <i>z</i> -scores to evaluate the significance of difference in proportions of IMGT clonotypes (AA) in the two compared sets from the IMGT/HighV-QUEST output                                                                                             |
| <b>Bonferroni</b>                 | The adjusted <i>p</i> -values issued from the Bonferroni multiple testing procedure                                                                                                                                                                                                         |
| <b>Holm</b>                       | The adjusted <i>p</i> -values issued from the Holm multiple testing procedure                                                                                                                                                                                                               |
| <b>Hochberg</b>                   | The adjusted <i>p</i> -values issued from the Hochberg multiple testing procedure                                                                                                                                                                                                           |
| <b>ŠidákSS</b>                    | The adjusted <i>p</i> -values issued from the Šidák single-step (SS) multiple testing procedure                                                                                                                                                                                             |
| <b>ŠidákSD</b>                    | The adjusted <i>p</i> -values issued from the Šidák single-down (SD) multiple testing procedure                                                                                                                                                                                             |
| <b>BH</b>                         | The adjusted <i>p</i> -values issued from the Benjamini & Hochberg (BH) multiple testing procedure                                                                                                                                                                                          |
| <b>BY</b>                         | The adjusted <i>p</i> -values issued from the Benjamini & Yekutieli (BY) multiple testing procedure                                                                                                                                                                                         |
| <b>Test_interpretation</b>        | The test interpretation: before adjustment of <i>p</i> -values (rawp) non-significant and after adjustment by the multiple testing procedure: significant differences in proportions validated by the seven procedures (All_p), by two or more procedures (Min_2p) and only by BH (Only_BH) |

**Table S3.** IMGT classes of the 20 common amino acids side chain properties

[http://www.imgt.org/IMGTeducation/Aide-memoire/\\_UK/aminoacids/IMGTclasses.html](http://www.imgt.org/IMGTeducation/Aide-memoire/_UK/aminoacids/IMGTclasses.html)

(from IMGT<sup>®</sup>, the international ImmunoGeneTics information system<sup>®</sup> (3), <http://www.imgt.org>).

| Amino acid    | Abbreviations       |   | IMGT classes of the amino acids side chain properties [15] |                       |                         |                                 |                       |                         |                                                      |  |
|---------------|---------------------|---|------------------------------------------------------------|-----------------------|-------------------------|---------------------------------|-----------------------|-------------------------|------------------------------------------------------|--|
|               |                     |   | Hydropathy<br>(3 classes)                                  | Volume<br>(5 classes) | Chemical<br>(7 classes) | Physicochemical<br>(11 classes) | Charge<br>(3 classes) | Polarity<br>(2 classes) | Hydrogen donor<br>or acceptor<br>atom<br>(4 classes) |  |
| Alanine       | <a href="#">Ala</a> | A | hydrophobic (1)                                            | very small            | aliphatic (1)           | aliphatic (1)                   | uncharged(3)          | nonpolar (2)            | none (4)                                             |  |
| Arginine      | <a href="#">Arg</a> | R | hydrophilic (3)                                            | large (4)             | basic (5)               | basic (5)                       | positive charged (1)  | polar (1)               | donor (1)                                            |  |
| Asparagine    | <a href="#">Asn</a> | N | hydrophilic (3)                                            | small (2)             | amide (7)               | amide (2)                       | uncharged (3)         | polar (1)               | donor and acceptor (3)                               |  |
| Aspartic acid | <a href="#">Asp</a> | D | hydrophilic (3)                                            | small (2)             | acidic (6)              | acidic (6)                      | negative charged (2)  | polar (1)               | acceptor (2)                                         |  |
| Cysteine      | <a href="#">Cys</a> | C | hydrophobic (1)                                            | small (2)             | sulfur (3)              | sulfur (3)                      | uncharged (3)         | nonpolar (2)            | none (4)                                             |  |
| Glutamine     | <a href="#">Gln</a> | Q | hydrophilic (3)                                            | medium (3)            | amide (7)               | amide (2)                       | uncharged (3)         | polar (1)               | donor and acceptor (3)                               |  |
| Glutamic acid | <a href="#">Glu</a> | E | hydrophilic (3)                                            | medium (3)            | acidic (6)              | acidic (6)                      | negative charged (2)  | polar (1)               | acceptor (2)                                         |  |
| Glycine       | <a href="#">Gly</a> | G | neutral (2)                                                | very small            | aliphatic (1)           | G (11)                          | uncharged (3)         | nonpolar (2)            | none (4)                                             |  |
| Histidine     | <a href="#">His</a> | H | neutral (2)                                                | medium (3)            | basic (5)               | basic (5)                       | positive charged (1)  | polar (1)               | donor and acceptor (3)                               |  |
| Isoleucine    | <a href="#">Ile</a> | I | hydrophobic (1)                                            | large (4)             | aliphatic (1)           | aliphatic (1)                   | uncharged (3)         | nonpolar (2)            | none (4)                                             |  |
| Leucine       | <a href="#">Leu</a> | L | hydrophobic (1)                                            | large (4)             | aliphatic (1)           | aliphatic (1)                   | uncharged (3)         | nonpolar (2)            | none (4)                                             |  |
| Lysine        | <a href="#">Lys</a> | K | hydrophilic (3)                                            | large (4)             | basic (5)               | basic (5)                       | positive charged (1)  | polar (1)               | donor (1)                                            |  |
| Methionine    | <a href="#">Met</a> | M | hydrophobic (1)                                            | large (4)             | sulfur (3)              | sulfur (3)                      | uncharged (3)         | nonpolar (1)            | none (4)                                             |  |
| Phenylalanine | <a href="#">Phe</a> | F | hydrophobic (1)                                            | very large (5)        | aromatic (2)            | F (7)                           | uncharged (3)         | nonpolar (1)            | none (4)                                             |  |
| Proline       | <a href="#">Pro</a> | P | neutral (2)                                                | small (2)             | aliphatic (1)           | P (10)                          | uncharged (3)         | nonpolar (1)            | none (4)                                             |  |
| Serine        | <a href="#">Ser</a> | S | neutral (2)                                                | very small            | hydroxyl (4)            | hydroxyl (4)                    | uncharged (3)         | polar (2)               | donor and acceptor (3)                               |  |
| Threonine     | <a href="#">Thr</a> | T | neutral (2)                                                | small (2)             | hydroxyl (4)            | hydroxyl (4)                    | uncharged (3)         | polar (2)               | donor and acceptor (3)                               |  |
| Tryptophan    | <a href="#">Trp</a> | W | hydrophobic (1)                                            | very large (5)        | aromatic (2)            | W (8)                           | uncharged (3)         | nonpolar (1)            | donor (1)                                            |  |
| Tyrosine      | <a href="#">Tyr</a> | Y | neutral (2)                                                | very large (5)        | aromatic (2)            | Y (9)                           | uncharged (3)         | polar (2)               | donor and acceptor (3)                               |  |
| Valine        | <a href="#">Val</a> | V | hydrophobic (1)                                            | medium (3)            | aliphatic (1)           | aliphatic (1)                   | uncharged (3)         | nonpolar (1)            | none (4)                                             |  |

- Numbers between parentheses indicate the class number, for a given property.

- Color codes of each class (1): <http://www.imgt.org/IMGTScientificChart/RepresentationRules/colormenu.php>
